# Supplementary material for: Optical coherence tomography reveals retinal thinning in schizophrenia spectrum disorders
Source: PubMed Central journal article supplement (PMC10085905; doi:10.1007/s00406-022-01455-z), 2022-08-05
Supplement: 406_2022_1455_MOESM1_ESM.pdf [file 406_2022_1455_MOESM1_ESM.pdf]

## Supplemental Information

# Optical coherence tomography reveals retinal thinning in schizophrenia spectrum disorders

Emanuel Boudriot<sup>1,\*</sup>, Benedikt Schworm<sup>2,\*</sup>, Lenka Krčmář<sup>1,3</sup>, Katharina Hanken<sup>1</sup>, Iris Jäger<sup>1</sup>, Marius Stephan<sup>1,3</sup>, Vanessa Gabriel<sup>1</sup>, Georgios Ioannou<sup>1</sup>, Julian Melcher<sup>1</sup>, Genc Hasanaj<sup>1</sup>, Mattia Campana<sup>1</sup>, Joanna Moussiopoulou<sup>1</sup>, Lisa Löhrs<sup>1</sup>, Alkomiet Hasan<sup>4</sup>, Peter Falkai<sup>1,5</sup>, Oliver Pogarell<sup>1</sup>, Siegfried Priglinger<sup>2</sup>, Daniel Keeser<sup>1,6,7</sup>, Christoph Kern<sup>2,\*</sup>, Elias Wagner<sup>1,\*</sup>, Florian J. Raabe<sup>1,3,\*</sup>

<sup>1</sup>Department of Psychiatry and Psychotherapy, University Hospital, LMU Munich, 80336 Munich, Germany

<sup>2</sup>Department of Ophthalmology, University Hospital, LMU Munich, 80336 Munich, Germany

<sup>3</sup>International Max Planck Research School for Translational Psychiatry (IMPRS-TP), 80804 Munich, Germany

<sup>4</sup>Department of Psychiatry, Psychotherapy and Psychosomatics, Medical Faculty, University of Augsburg, 86156 Augsburg, Germany

<sup>5</sup>Max Planck Institute of Psychiatry, 80804 Munich, Germany

<sup>6</sup>NeuroImaging Core Unit Munich (NICUM), University Hospital, LMU Munich, 80336 Munich, Germany

<sup>7</sup>Munich Center for Neurosciences (MCN), LMU Munich, 82152 Planegg-Martinsried, Germany

\*These authors contributed equally.

✉ Florian J. Raabe

florian.raabe@med.uni-muenchen.de

**Table of Contents**

|                                                                                                                                                                                            |    |
|--------------------------------------------------------------------------------------------------------------------------------------------------------------------------------------------|----|
| Supplemental Text                                                                                                                                                                          | 3  |
| Supplemental Figures                                                                                                                                                                       | 4  |
| Fig. S1   Exemplary illustration of the partial effects of the model predictors on the mean peripapillary retinal nerve fiber layer thickness                                              | 4  |
| Fig. S2   Partial effects of schizophrenia spectrum disorder on retinal thickness and microvasculature, calculated for both eyes (OU) and separately for the right (OD) and left (OS) eyes | 5  |
| Fig. S3   Association of treatment-resistant schizophrenia and retinal thickness                                                                                                           | 7  |
| Supplemental Tables                                                                                                                                                                        | 8  |
| Table S1   Estimates for the group coefficients (patients with schizophrenia spectrum disorders vs healthy controls) of the additive models for the right (OD) and left (OS) eyes          | 8  |
| Table S2   Association between optical coherence tomography and clinical parameters (oculus uterque)                                                                                       | 9  |
| Table S3   Association of treatment-resistant schizophrenia and retinal thickness                                                                                                          | 10 |
| Supplemental Model Reports                                                                                                                                                                 | 11 |
| Model Summaries (oculus uterque)                                                                                                                                                           | 11 |
| Non-linear Effects (oculus uterque)                                                                                                                                                        | 18 |

## Supplemental Text

After quality control, scans from 153 eyes of 79 patients with schizophrenia spectrum disorders (SSDs) and 166 eyes of 84 healthy controls were eligible for analysis. Of these, 5 patients and 1 healthy control had an intraocular pressure (IOP) greater than or equal to 21 mmHg. One right and 1 left eye in the healthy control group (but none in the patient group) had a spherical equivalent greater than or equal to 6 diopter (D), and 9 right and 9 left eyes of patients and 3 right and 4 left eyes of healthy controls had a spherical equivalent less than or equal to -6 D (if participants had a history of refractive surgery, we used the preoperative values). Furthermore, the following ophthalmological or neurological comorbidities led to exclusion: retinal pigment epithelial detachment (1 control), age-related macular degeneration (1 control, 1 patient with SSD), epiretinal gliosis (1 control), normal-tension glaucoma (1 control), unilateral optic nerve hypoplasia (1 control), history of evisceration of the right eye (1 control), optic disc drusen (1 patient with SSD), intraretinal fluid (1 patient with SSD), central serous chorioretinopathy (1 patient with SSD), presence of fibrae medullares (1 patient with SSD), history of recurrent iritis and cerebral ischemia (1 control), history of encephalitis (2 patients with SSDs) or meningitis (1 control), and history of epilepsy surgery (1 patient with SSD). Note that some participants met more than one exclusion criterion.

## Supplemental Figures

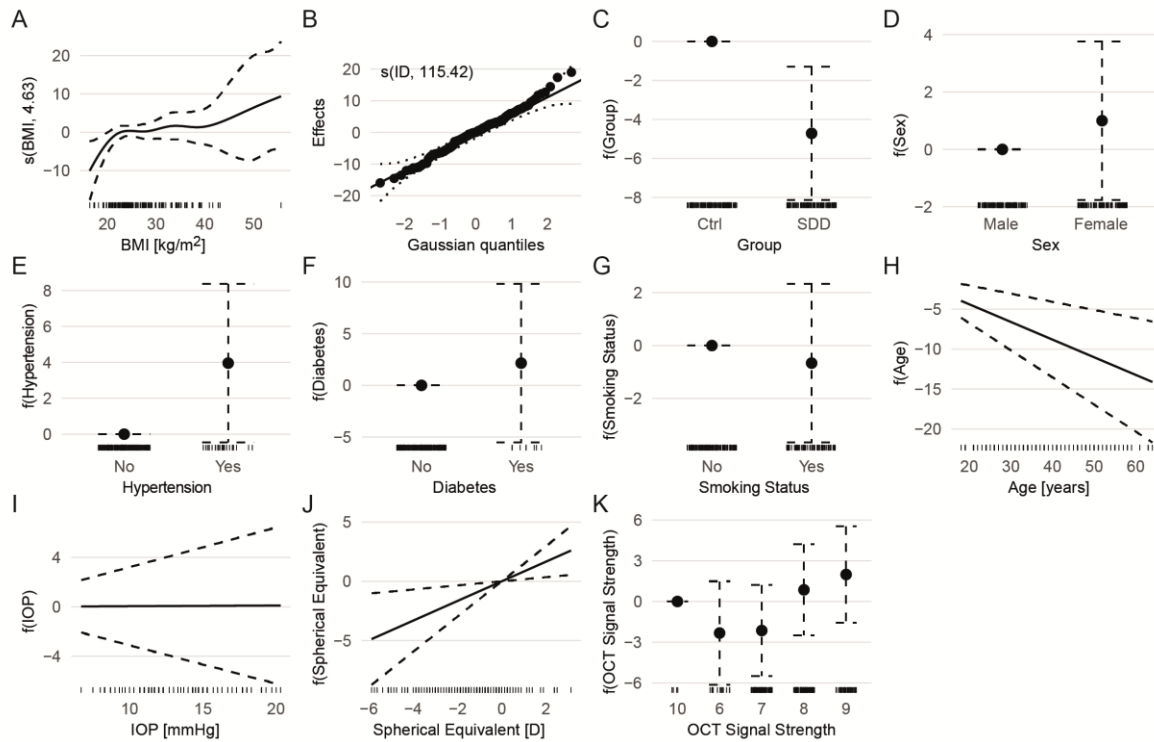

**Fig. S1 | Exemplary illustration of the partial effects of the model predictors on the mean peripapillary retinal nerve fiber layer thickness**

Shown are **A**, the non-linear effect of the body mass index; **B**, the distribution of the random intercepts; and **C–K**, plots for the parametric coefficients. Dashed lines represent 95% confidence intervals.

*Abbreviations:* BMI, body mass index; D, diopter; IOP, intraocular pressure; OCT, optical coherence tomography.

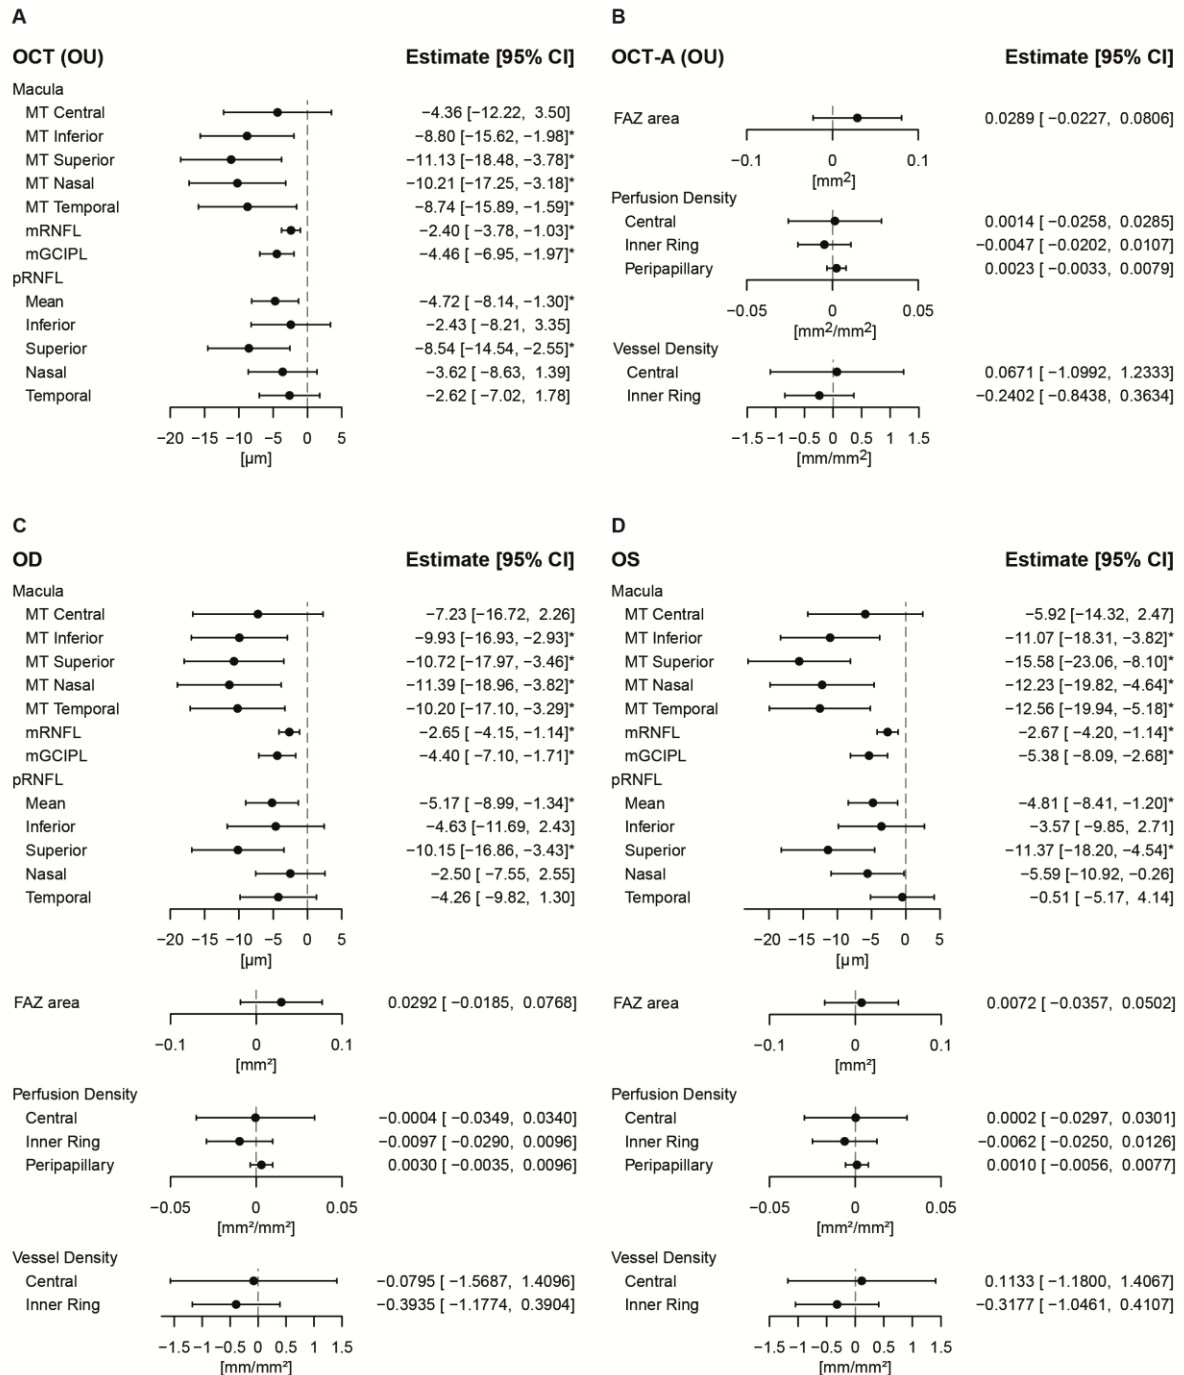

**Fig. S2 | Partial effects of schizophrenia spectrum disorder on retinal thickness and microvasculature, calculated for both eyes (OU) and separately for the right (OD) and left (OS) eyes**

**A** Forest plots showing the estimates for the partial effect of the group (patients with schizophrenia spectrum disorders [SSDs] vs healthy controls [Ctrl]) on optical coherence tomography (OCT) parameters, as obtained in additive mixed models. \* $p < .05$  (false discovery rate [FDR] adjusted)

**B** Forest plots showing the estimates for the partial effect of the group (patients with SSDs vs Ctrl) on OCT angiography (OCT-A) parameters, as obtained in additive mixed models. \* $p < .05$  (FDR adjusted)

**C** Forest plots showing the estimates for the partial effect of group (patients with SSDs vs Ctrl) on optical coherence tomography (OCT) and optical coherence tomography angiography (OCT-A) parameters of the right eye (OD), as obtained in additive regression models. \* $p < .05$  (FDR adjusted)

**D** Forest plots showing the estimates for the partial effect of group (SSDs vs Ctrl) on OCT and OCT-A parameters of the left eye (OS), as obtained in additive regression models. \* $p < .05$  (FDR adjusted)

*Abbreviations:* CI, confidence interval; FAZ, foveal avascular zone; mGCIPL, macular ganglion cell–inner plexiform layer; mRNFL, macular retinal nerve fiber layer; MT Central, macular thickness in the central subfield; MT Inferior, macular thickness in the inner inferior subfield; MT Superior, macular thickness in the inner superior subfield; MT Nasal, macular thickness in the inner nasal subfield; MT Temporal, macular thickness in the inner temporal subfield; OD, oculus dexter (right eye); OS, oculus sinister (left eye); OU, oculus uterque (both eyes); pRNFL, peripapillary retinal nerve fiber layer.

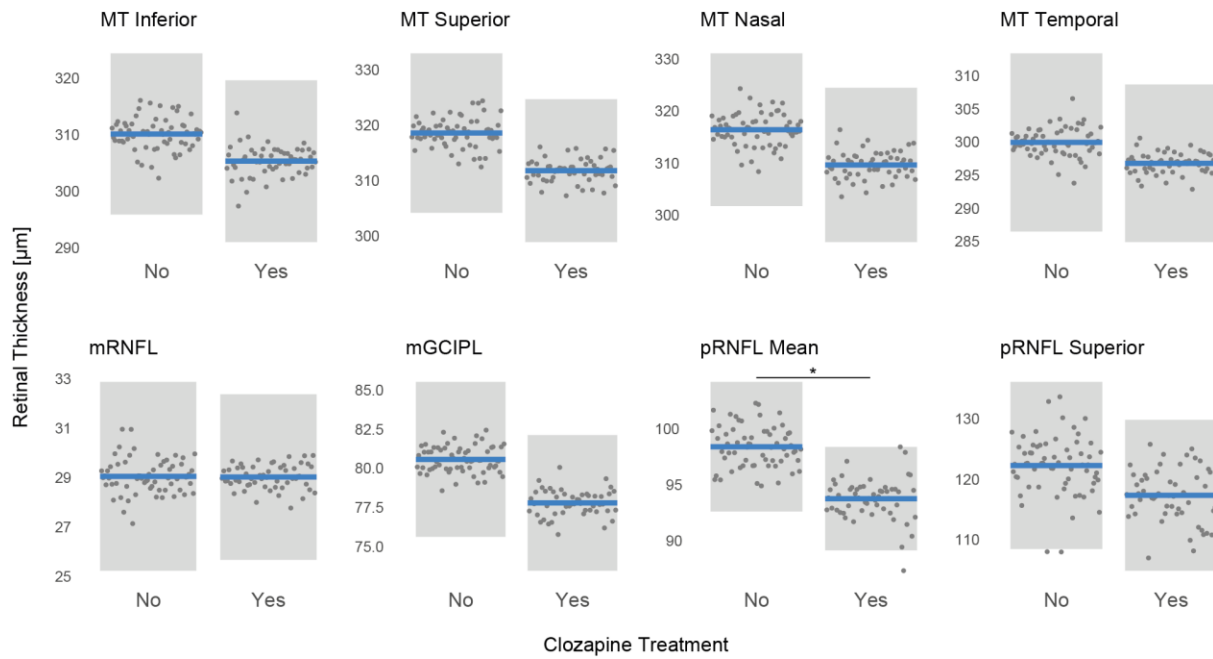

**Fig. S3 | Association of treatment-resistant schizophrenia and retinal thickness**

Lifetime history of clozapine use (yes) serves as a proxy for treatment resistance. The plots show how the expected values of the outcome variables (blue lines) change as a function of lifetime clozapine use (yes:no) when all other model terms are held fixed. Included are 95% confidence intervals (grey) and dots for the partial residuals. \* $p < .05$

*Abbreviations:* mGCIPL, macular ganglion cell–inner plexiform layer; mRNFL, macular retinal nerve fiber layer; MT Central, macular thickness in the central subfield; MT Inferior, macular thickness in the inner inferior subfield; MT Superior, macular thickness in the inner superior subfield; MT Nasal, macular thickness in the inner nasal subfield; MT Temporal, macular thickness in the inner temporal subfield; pRNFL, peripapillary retinal nerve fiber layer.

## Supplemental Tables

**Table S1 | Estimates for the group coefficients (patients with schizophrenia spectrum disorders vs healthy controls) of the additive models for the right (OD) and left (OS) eyes**

| Eye                              | Dependent OCT/OCT-A Variable  | Estimate [95% CI]            | n     | p     | p (FDR adj.) |    |
|----------------------------------|-------------------------------|------------------------------|-------|-------|--------------|----|
| OD                               | MT, central subfield          | -7.2301 [-16.7221, 2.2619]   | 131   | .1382 | .2764        | ns |
|                                  | MT, inner inferior subfield   | -9.9309 [-16.9301, -2.9316]  | 131   | .0063 | .0180        | *  |
|                                  | MT, inner superior subfield   | -10.7172 [-17.9746, -3.4598] | 131   | .0045 | .0153        | *  |
|                                  | MT, inner nasal subfield      | -11.3905 [-18.9591, -3.8220] | 131   | .0039 | .0149        | *  |
|                                  | MT, inner temporal subfield   | -10.1959 [-17.0970, -3.2949] | 131   | .0045 | .0153        | *  |
|                                  | mRNFL thickness               | -2.6471 [-4.1545, -1.1397]   | 131   | .0008 | .0079        | *  |
|                                  | mGCIPL thickness              | -4.4044 [-7.0972, -1.7116]   | 131   | .0018 | .0105        | *  |
|                                  | pRNFL thickness, mean         | -5.1666 [-8.9922, -1.3409]   | 125   | .0094 | .0241        | *  |
|                                  | pRNFL thickness, inferior     | -4.6316 [-11.6925, 2.4294]   | 125   | .2013 | .3623        | ns |
|                                  | pRNFL thickness, superior     | -10.1475 [-16.8638, -3.4311] | 125   | .0038 | .0149        | *  |
|                                  | pRNFL thickness, nasal        | -2.5045 [-7.5544, 2.5455]    | 125   | .3332 | .4735        | ns |
|                                  | pRNFL thickness, temporal     | -4.2598 [-9.8191, 1.2995]    | 125   | .1360 | .2764        | ns |
|                                  | FAZ area                      | 0.0292 [-0.0185, 0.0768]     | 109   | .2330 | .4059        | ns |
|                                  | Perfusion density, central    | -0.0004 [-0.0349, 0.0340]    | 115   | .9798 | .9883        | ns |
|                                  | Perfusion density, inner ring | -0.0097 [-0.0290, 0.0096]    | 115   | .3258 | .4735        | ns |
|                                  | Vessel density, central       | -0.0795 [-1.5687, 1.4096]    | 115   | .9169 | .9565        | ns |
|                                  | Vessel density, inner ring    | -0.3935 [-1.1774, 0.3904]    | 115   | .3276 | .4735        | ns |
| Perfusion density, peripapillary | 0.0030 [-0.0035, 0.0096]      | 117                          | .3664 | .5073 | ns           |    |
| OS                               | MT, central subfield          | -5.9234 [-14.3157, 2.4689]   | 132   | .1693 | .3153        | ns |
|                                  | MT, inner inferior subfield   | -11.0668 [-18.3098, -3.8239] | 132   | .0034 | .0149        | *  |
|                                  | MT, inner superior subfield   | -15.5820 [-23.0637, -8.1003] | 132   | .0001 | .0044        | *  |
|                                  | MT, inner nasal subfield      | -12.2304 [-19.8239, -4.6369] | 132   | .0020 | .0110        | *  |
|                                  | MT, inner temporal subfield   | -12.5601 [-19.9391, -5.1810] | 132   | .0011 | .0088        | *  |
|                                  | mRNFL thickness               | -2.6697 [-4.2008, -1.1386]   | 132   | .0009 | .0079        | *  |
|                                  | mGCIPL thickness              | -5.3832 [-8.0860, -2.6805]   | 132   | .0002 | .0044        | *  |
|                                  | pRNFL thickness, mean         | -4.8073 [-8.4144, -1.2001]   | 131   | .0102 | .0251        | *  |
|                                  | pRNFL thickness, inferior     | -3.5678 [-9.8488, 2.7132]    | 131   | .2679 | .4307        | ns |
|                                  | pRNFL thickness, superior     | -11.3731 [-18.2043, -4.5420] | 131   | .0015 | .0099        | *  |
|                                  | pRNFL thickness, nasal        | -5.5925 [-10.9207, -0.2643]  | 131   | .0420 | .0907        | ns |
|                                  | pRNFL thickness, temporal     | -0.5109 [-5.1655, 4.1437]    | 131   | .8300 | .9338        | ns |
|                                  | FAZ area                      | 0.0072 [-0.0357, 0.0502]     | 111   | .7418 | .8708        | ns |
|                                  | Perfusion density, central    | 0.0002 [-0.0297, 0.0301]     | 116   | .9883 | .9883        | ns |
|                                  | Perfusion density, inner ring | -0.0062 [-0.0250, 0.0126]    | 116   | .5199 | .6380        | ns |
|                                  | Vessel density, central       | 0.1133 [-1.1800, 1.4067]     | 116   | .8640 | .9521        | ns |
|                                  | Vessel density, inner ring    | -0.3177 [-1.0461, 0.4107]    | 116   | .3946 | .5328        | ns |
| Perfusion density, peripapillary | 0.0010 [-0.0056, 0.0077]      | 114                          | .7678 | .8821 | ns           |    |

*Abbreviations:* FAZ, foveal avascular zone; MT, macular thickness; mRNFL, macular retinal nerve fiber layer; mGCIPL, macular combined ganglion cell layer and inner plexiform layer; n, number of eyes (patients with schizophrenia spectrum disorders and healthy controls); ns, not significant; OCT, optical coherence tomography; OCT-A, optical coherence tomography angiography; OD, oculus dexter; OS, oculus sinister; p, p value; p (FDR adj.), false discovery rate adjusted p value; pRNFL, peripapillary retinal nerve fiber layer.

\*p < .05



**Table S2 | Association between optical coherence tomography and clinical parameters (oculus uterque)**

| Clinical parameter                           | Dependent OCT measure       | Estimate [95% CI]          | N  | n   | p               |
|----------------------------------------------|-----------------------------|----------------------------|----|-----|-----------------|
| Chlorpromazine equivalent doses <sup>a</sup> | MT, inner inferior subfield | -0.0144 [-0.0282, -0.0006] | 54 | 101 | .0468 *         |
|                                              | MT, inner superior subfield | -0.0125 [-0.0266, 0.0016]  | 54 | 101 | .0889 <i>ns</i> |
|                                              | MT, inner nasal subfield    | -0.0186 [-0.0318, -0.0053] | 54 | 101 | .0087 *         |
|                                              | MT, inner temporal subfield | -0.0169 [-0.0302, -0.0037] | 54 | 101 | .0162 *         |
|                                              | mRNFL                       | -0.0029 [-0.0052, -0.0005] | 54 | 101 | .0199 *         |
|                                              | mGCIPL                      | -0.0011 [-0.0072, 0.0050]  | 54 | 101 | .7307 <i>ns</i> |
|                                              | pRNFL, mean                 | 0.0019 [-0.0062, 0.0099]   | 54 | 101 | .6522 <i>ns</i> |
|                                              | pRNFL, superior             | -0.0001 [-0.0129, 0.0128]  | 54 | 101 | .9924 <i>ns</i> |
| Duration of illness <sup>b</sup>             | MT, inner inferior subfield | -0.7078 [-1.2977, -0.1180] | 63 | 119 | .0224 *         |
|                                              | MT, inner superior subfield | -0.8307 [-1.4156, -0.2458] | 63 | 119 | .0075 *         |
|                                              | MT, inner nasal subfield    | -0.6398 [-1.2503, -0.0292] | 63 | 119 | .0449 *         |
|                                              | MT, inner temporal subfield | -0.7085 [-1.3297, -0.0874] | 63 | 119 | .0301 *         |
|                                              | mRNFL                       | -0.1729 [-0.3025, -0.0432] | 63 | 119 | .0116 *         |
|                                              | mGCIPL                      | -0.2526 [-0.5182, 0.0130]  | 63 | 119 | .0686 <i>ns</i> |
|                                              | pRNFL, mean                 | -0.0284 [-0.2968, 0.2401]  | 62 | 117 | .8367 <i>ns</i> |
|                                              | pRNFL, superior             | 0.0828 [-0.4259, 0.5915]   | 62 | 117 | .7509 <i>ns</i> |

*Abbreviations:* CI, confidence interval; mGCIPL, macular ganglion cell–inner plexiform layer; mRNFL, macular retinal nerve fiber layer; MT, macular thickness; N, number of patients; n, number of eyes; *ns*, not significant; *p*, *p* value; pRNFL, peripapillary retinal nerve fiber layer.

<sup>a</sup>Ten patients had missing data for chlorpromazine equivalent doses.

<sup>b</sup>Two patients had missing data for duration of illness.

\**p* < .05

**Table S3 | Association of treatment-resistant schizophrenia and retinal thickness**

| Dependent OCT measure       | Estimate [95% CI]          | N  | n   | <i>p</i> |           |
|-----------------------------|----------------------------|----|-----|----------|-----------|
| MT, inner inferior subfield | -4.8176 [-13.4839, 3.8488] | 63 | 119 | .2808    | <i>ns</i> |
| MT, inner superior subfield | -6.7795 [-15.5244, 1.9653] | 63 | 119 | .1354    | <i>ns</i> |
| MT, inner nasal subfield    | -6.7771 [-15.6789, 2.1248] | 63 | 119 | .1416    | <i>ns</i> |
| MT, inner temporal subfield | -3.1537 [-11.6526, 5.3451] | 63 | 119 | .4706    | <i>ns</i> |
| mRNFL thickness             | -0.0280 [-1.7476, 1.6915]  | 63 | 119 | .9746    | <i>ns</i> |
| mGCIPL thickness            | -2.7772 [-5.8963, 0.3419]  | 63 | 119 | .0869    | <i>ns</i> |
| pRNFL thickness, mean       | -4.6366 [-8.1235, -1.1497] | 62 | 118 | .0117    | *         |
| pRNFL thickness, superior   | -4.9276 [-11.1631, 1.3079] | 62 | 118 | .1269    | <i>ns</i> |

Lifetime history of treatment with clozapine (yes:no) serves as a proxy for treatment resistance. Information on clozapine use was missing in two patients.

*Abbreviations:* CI, confidence interval; mGCIPL, macular ganglion cell–inner plexiform layer; mRNFL, macular retinal nerve fiber layer; MT, macular thickness; N, number of patients; n, number of eyes; *ns*, not significant; *p*, *p* value; pRNFL, peripapillary retinal nerve fiber layer.

\**p* < .05

## Supplemental Model Reports

### Model Summaries (oculus uterque)

*Abbreviations:* BMI, body mass index; edf, estimated degrees of freedom; FAZ, foveal avascular zone; ID, random intercept for the participant identification; IOP, intraocular pressure; mGCIPL, macular ganglion cell–inner plexiform layer; mRNFL, macular retinal nerve fiber layer; OCT, optical coherence tomography; pRNFL, peripapillary retinal nerve fiber layer; Ref.df, reference degrees of freedom; Std. Error, Standard error.

| <b>A. Parametric coefficients</b> | <b>Estimate</b> | <b>Std. Error</b> | <b>t value</b> | <b>p value</b> |
|-----------------------------------|-----------------|-------------------|----------------|----------------|
| Intercept                         | 273.2090        | 4.5446            | 6.1168         | < .0001        |
| Group                             | -4.3611         | 4.0119            | -1.0870        | .2792          |
| Sex (female)                      | -17.2888        | 3.2214            | -5.3669        | < .0001        |
| Hypertension                      | 17.2290         | 5.1172            | 3.3669         | .0010          |
| Diabetes                          | -5.3662         | 8.0982            | -0.6626        | .5088          |
| Smoking                           | 3.7847          | 3.4822            | 1.0868         | .2792          |
| IOP                               | -0.3476         | 0.2581            | -1.3470        | .1805          |
| OCT signal strength (9)           | 0.3805          | 1.0108            | 0.3765         | .7072          |
| OCT signal strength (8)           | 2.2587          | 1.1700            | 1.9306         | .0558          |
| OCT signal strength (7)           | 4.1718          | 1.3616            | 3.0639         | .0027          |
| OCT signal strength (6)           | 0.2940          | 3.6488            | 0.0806         | .9359          |
| <b>B. Smooth terms</b>            | <b>edf</b>      | <b>Ref.df</b>     | <b>F value</b> | <b>p value</b> |
| Age                               | 1.5389          | 1.5488            | 4.1404         | .0528          |
| BMI                               | 2.7786          | 2.7960            | 5.1438         | .0024          |
| Spherical equivalent              | 3.0433          | 3.7283            | 1.2313         | .2414          |
| ID                                | 121.5032        | 128.0000          | 42.1426        | < .0001        |

**Dependent: Macular Thickness [μm], Central Subfield**

| <b>A. Parametric coefficients</b> | <b>Estimate</b> | <b>Std. Error</b> | <b>t value</b> | <b>p value</b> |
|-----------------------------------|-----------------|-------------------|----------------|----------------|
| Intercept                         | 334.3737        | 5.8677            | 56.9855        | < .0001        |
| Group                             | -8.8016         | 3.4786            | -2.5302        | .0127          |
| Sex (female)                      | -11.8585        | 2.7802            | -4.2653        | < .0001        |
| Hypertension                      | 7.0026          | 4.4419            | 1.5765         | .1175          |
| Diabetes                          | -2.2719         | 6.9312            | -0.3278        | .7436          |
| Smoking                           | 3.4917          | 3.0136            | 1.1586         | .2488          |
| Age                               | -0.1229         | 0.1194            | -1.0293        | .3053          |
| IOP                               | -0.1325         | 0.2568            | -0.5159        | .6068          |
| OCT Signal Strength (9)           | 0.2792          | 1.0469            | 0.2667         | .7901          |
| OCT Signal Strength (8)           | 1.2895          | 1.2076            | 1.0678         | .2877          |
| OCT Signal Strength (7)           | 4.1857          | 1.4047            | 2.9798         | .0035          |
| OCT Signal Strength (6)           | 1.6825          | 3.7213            | 0.4521         | .6520          |
| <b>B. Smooth terms</b>            | <b>edf</b>      | <b>Ref.df</b>     | <b>F value</b> | <b>p value</b> |
| BMI                               | 6.0128          | 6.0318            | 1.6420         | .1426          |
| Spherical Equivalent              | 4.1455          | 4.9212            | 1.0004         | .3885          |
| ID                                | 116.9291        | 128.0000          | 25.7504        | < .0001        |

**Dependent: Macular Thickness [μm], Inner Inferior Subfield**

| <b>A. Parametric coefficients</b> | <b>Estimate</b> | <b>Std. Error</b> | <b>t value</b> | <b>p value</b> |
|-----------------------------------|-----------------|-------------------|----------------|----------------|
| Intercept                         | 334.8099        | 4.4465            | 75.2981        | < .0001        |
| Group                             | -11.1310        | 3.7503            | -2.9680        | .0036          |
| Sex (female)                      | -10.5523        | 3.0106            | -3.5050        | .0006          |
| Hypertension                      | 8.7140          | 4.7715            | 1.8263         | .0702          |
| Diabetes                          | -6.0631         | 7.5278            | -0.8054        | .4221          |
| Smoking                           | 3.5736          | 3.2398            | 1.1030         | .2721          |
| IOP                               | -0.2393         | 0.2589            | -0.9240        | .3573          |
| OCT Signal Strength (9)           | 0.9599          | 1.0314            | 0.9306         | .3538          |
| OCT Signal Strength (8)           | 2.3848          | 1.1923            | 2.0002         | .0477          |
| OCT Signal Strength (7)           | 4.9523          | 1.3897            | 3.5636         | .0005          |
| OCT Signal Strength (6)           | 1.4085          | 3.7104            | 0.3796         | .7049          |
| <b>B. Smooth terms</b>            | <b>edf</b>      | <b>Ref.df</b>     | <b>F value</b> | <b>p value</b> |
| Age                               | 1.0000          | 1.0000            | 0.4016         | .5274          |
| BMI                               | 3.5992          | 3.6209            | 1.2130         | .2433          |
| Spherical Equivalent              | 2.3787          | 2.9159            | 0.9141         | .4735          |
| ID                                | 120.5127        | 128.0000          | 28.1676        | < .0001        |

**Dependent: Macular Thickness [ $\mu\text{m}$ ], Inner Superior Subfield**

| <b>A. Parametric coefficients</b> | <b>Estimate</b> | <b>Std. Error</b> | <b>t value</b> | <b>p value</b> |
|-----------------------------------|-----------------|-------------------|----------------|----------------|
| Intercept                         | 340.0058        | 5.8910            | 57.7165        | < .0001        |
| Group                             | -10.2115        | 3.5898            | -2.8446        | .0052          |
| Sex (female)                      | -14.1124        | 2.8825            | -4.8960        | < .0001        |
| Hypertension                      | 9.9115          | 4.6050            | 2.1523         | .0333          |
| Diabetes                          | -4.5759         | 7.1699            | -0.6382        | .5245          |
| Smoking                           | 4.6525          | 3.1207            | 1.4908         | .1385          |
| Age                               | 0.0018          | 0.1227            | 0.0144         | .9885          |
| IOP                               | -0.3504         | 0.2473            | -1.4169        | .1590          |
| Spherical Equivalent              | 0.1148          | 0.5780            | 0.1987         | .8428          |
| OCT Signal Strength (9)           | -0.3001         | 0.9851            | -0.3047        | .7611          |
| OCT Signal Strength (8)           | 1.4621          | 1.1363            | 1.2867         | .2006          |
| OCT Signal Strength (7)           | 3.5293          | 1.3285            | 2.6565         | .0089          |
| OCT Signal Strength (6)           | -0.5568         | 3.5623            | -0.1563        | .8760          |
| <b>B. Smooth terms</b>            | <b>edf</b>      | <b>Ref.df</b>     | <b>F value</b> | <b>p value</b> |
| BMI                               | 6.0564          | 6.0718            | 1.9368         | .0789          |
| ID                                | 118.3326        | 128.0000          | 32.1257        | < .0001        |

**Dependent: Macular Thickness [ $\mu\text{m}$ ], Inner Nasal Subfield**

| <b>A. Parametric coefficients</b> | <b>Estimate</b> | <b>Std. Error</b> | <b>t value</b> | <b>p value</b> |
|-----------------------------------|-----------------|-------------------|----------------|----------------|
| Intercept                         | 319.9348        | 5.8473            | 54.7148        | < .0001        |
| Group                             | -8.7382         | 3.6490            | -2.3947        | .0181          |
| Sex (female)                      | -11.9310        | 2.9389            | -4.0597        | .0001          |
| Hypertension                      | 9.4892          | 4.6584            | 2.0370         | .0438          |
| Diabetes                          | -5.2826         | 7.3425            | -0.7195        | .4732          |
| Smoking                           | 3.3686          | 3.1605            | 1.0658         | .2886          |
| Age                               | 0.0358          | 0.1260            | 0.2843         | .7767          |
| IOP                               | -0.2508         | 0.2267            | -1.1064        | .2707          |
| OCT Signal Strength (9)           | 0.7056          | 0.8801            | 0.8017         | .4242          |
| OCT Signal Strength (8)           | 2.3049          | 1.0187            | 2.2625         | .0254          |
| OCT Signal Strength (7)           | 5.5012          | 1.1882            | 4.6300         | < .0001        |
| OCT Signal Strength (6)           | 3.4695          | 3.1971            | 1.0852         | .2799          |
| <b>B. Smooth terms</b>            | <b>edf</b>      | <b>Ref.df</b>     | <b>F value</b> | <b>p value</b> |
| BMI                               | 3.5786          | 3.5952            | 1.1014         | .3259          |
| Spherical Equivalent              | 1.7856          | 2.1944            | 0.6364         | .5194          |
| ID                                | 121.7209        | 128.0000          | 38.4858        | < .0001        |

**Dependent: Macular Thickness [ $\mu\text{m}$ ], Inner Temporal Subfield**

| <b>A. Parametric coefficients</b> | <b>Estimate</b> | <b>Std. Error</b> | <b>t value</b> | <b>p value</b> |
|-----------------------------------|-----------------|-------------------|----------------|----------------|
| Intercept                         | 34.0468         | 1.3612            | 25.0119        | < .0001        |
| Group                             | -2.4031         | 0.7006            | -3.4302        | .0008          |
| Sex (female)                      | -0.9940         | 0.5433            | -1.8295        | .0696          |
| Hypertension                      | 2.6332          | 0.9035            | 2.9143         | .0042          |
| Diabetes                          | 0.3703          | 1.4525            | 0.2549         | .7992          |
| Smoking                           | 0.1294          | 0.6175            | 0.2095         | .8344          |
| BMI                               | 0.0498          | 0.0531            | 0.9381         | .3500          |
| OCT Signal Strength (9)           | -0.4582         | 0.2515            | -1.8215        | .0709          |
| OCT Signal Strength (8)           | -0.4938         | 0.2893            | -1.7067        | .0903          |
| OCT Signal Strength (7)           | -0.5731         | 0.3381            | -1.6948        | .0925          |
| OCT Signal Strength (6)           | 0.0608          | 0.8889            | 0.0684         | .9456          |
| <b>B. Smooth terms</b>            | <b>edf</b>      | <b>Ref.df</b>     | <b>F value</b> | <b>p value</b> |
| Age                               | 2.7193          | 2.7534            | 1.3709         | .3559          |
| IOP                               | 1.0000          | 1.0000            | 2.1981         | .1406          |
| Spherical Equivalent              | 1.9620          | 2.3446            | 10.8054        | < .0001        |
| ID                                | 118.4307        | 128.0000          | 20.1202        | < .0001        |

**Dependent: mRNFL Thickness [ $\mu\text{m}$ ]**

| <b>A. Parametric coefficients</b> | <b>Estimate</b> | <b>Std. Error</b> | <b>t value</b> | <b>p value</b> |
|-----------------------------------|-----------------|-------------------|----------------|----------------|
| Intercept                         | 90.1545         | 2.0001            | 45.0739        | < .0001        |
| Group                             | -4.4632         | 1.2698            | -3.5148        | .0006          |
| Sex (female)                      | -1.2838         | 1.0233            | -1.2546        | .2120          |
| Hypertension                      | 1.1054          | 1.6267            | 0.6795         | .4981          |
| Diabetes                          | 1.6679          | 2.5479            | 0.6546         | .5139          |
| Smoking                           | -0.5392         | 1.1056            | -0.4876        | .6267          |
| Age                               | -0.1160         | 0.0436            | -2.6576        | .0089          |
| IOP                               | -0.0366         | 0.0755            | -0.4853        | .6283          |
| Spherical Equivalent              | 0.3831          | 0.1840            | 2.0821         | .0394          |
| OCT Signal Strength (9)           | 0.1794          | 0.2907            | 0.6173         | .5381          |
| OCT Signal Strength (8)           | 0.2992          | 0.3361            | 0.8903         | .3750          |
| OCT Signal Strength (7)           | 0.8009          | 0.3926            | 2.0402         | .0434          |
| OCT Signal Strength (6)           | -0.2134         | 1.0620            | -0.2009        | .8411          |
| <b>B. Smooth terms</b>            | <b>edf</b>      | <b>Ref.df</b>     | <b>F value</b> | <b>p value</b> |
| BMI                               | 5.1265          | 5.1400            | 2.6407         | .0354          |
| ID                                | 120.6416        | 129.0000          | 46.5600        | < .0001        |

**Dependent: mGCIPL Thickness [ $\mu\text{m}$ ]**

| <b>A. Parametric coefficients</b> | <b>Estimate</b> | <b>Std. Error</b> | <b>t value</b> | <b>p value</b> |
|-----------------------------------|-----------------|-------------------|----------------|----------------|
| Intercept                         | 103.4690        | 3.6427            | 28.4041        | < .0001        |
| Group                             | -4.7171         | 1.7441            | -2.7046        | .0078          |
| Sex (female)                      | 0.9984          | 1.4096            | 0.7083         | .4801          |
| Hypertension                      | 3.9553          | 2.2526            | 1.7559         | .0816          |
| Diabetes                          | 2.1524          | 3.9156            | 0.5497         | .5835          |
| Smoking                           | -0.6641         | 1.5304            | -0.4339        | .6651          |
| Age                               | -0.2205         | 0.0603            | -3.6580        | .0004          |
| IOP                               | 0.0053          | 0.1611            | 0.0328         | .9739          |
| Spherical Equivalent              | 0.8312          | 0.3356            | 2.4766         | .0146          |
| OCT Signal Strength (9)           | 1.9862          | 1.8147            | 1.0945         | .2759          |
| OCT Signal Strength (8)           | 0.8564          | 1.7105            | 0.5007         | .6175          |
| OCT Signal Strength (7)           | -2.1397         | 1.7168            | -1.2463        | .2150          |
| OCT Signal Strength (6)           | -2.3242         | 1.9447            | -1.1951        | .2343          |
| <b>B. Smooth terms</b>            | <b>edf</b>      | <b>Ref.df</b>     | <b>F value</b> | <b>p value</b> |
| BMI                               | 4.6284          | 4.6693            | 1.8594         | .1390          |
| ID                                | 115.4244        | 128.0000          | 13.7528        | < .0001        |

**Dependent: pRNFL Thickness [ $\mu\text{m}$ ], Mean (see also Fig. S1)**

| <b>A. Parametric coefficients</b> | <b>Estimate</b> | <b>Std. Error</b> | <b>t value</b> | <b>p value</b> |
|-----------------------------------|-----------------|-------------------|----------------|----------------|
| Intercept                         | 137.6984        | 5.2765            | 26.0968        | < .0001        |
| Group                             | -2.4424         | 2.9302            | -0.8335        | .4061          |
| Sex (female)                      | 3.7009          | 2.3551            | 1.5715         | .1186          |
| Hypertension                      | 2.2986          | 3.7693            | 0.6098         | .5431          |
| Diabetes                          | 2.0951          | 6.5630            | 0.3192         | .7501          |
| Smoking                           | -2.5910         | 2.5447            | -1.0182        | .3105          |
| Age                               | -0.3336         | 0.1013            | -3.2924        | .0013          |
| Spherical Equivalent              | 3.0393          | 0.6024            | 5.0453         | < .0001        |
| OCT Signal Strength (9)           | 3.2507          | 3.8028            | 0.8548         | .3943          |
| OCT Signal Strength (8)           | -1.1920         | 3.5974            | -0.3313        | .7409          |
| OCT Signal Strength (7)           | -5.0012         | 3.6210            | -1.3812        | .1697          |
| OCT Signal Strength (6)           | -2.9702         | 4.0715            | -0.7295        | .4670          |
| <b>B. Smooth terms</b>            | <b>edf</b>      | <b>Ref.df</b>     | <b>F value</b> | <b>p value</b> |
| BMI                               | 3.1300          | 3.1955            | 1.5405         | .2023          |
| IOP                               | 3.1616          | 3.7742            | 0.9764         | .4976          |
| ID                                | 111.4267        | 128.0000          | 9.4644         | < .0001        |

**Dependent: pRNFL Thickness [ $\mu\text{m}$ ], Inferior Quadrant**

| <b>A. Parametric coefficients</b> | <b>Estimate</b> | <b>Std. Error</b> | <b>t value</b> | <b>p value</b> |
|-----------------------------------|-----------------|-------------------|----------------|----------------|
| Intercept                         | 111.6996        | 8.5468            | 13.0691        | < .0001        |
| Group                             | -8.5430         | 3.0592            | -2.7926        | .0060          |
| Sex (female)                      | -2.2556         | 2.3622            | -0.9548        | .3414          |
| Hypertension                      | 3.6689          | 3.9994            | 0.9174         | .3606          |
| Diabetes                          | 6.1390          | 6.9107            | 0.8883         | .3759          |
| Smoking                           | -0.7462         | 2.6828            | -0.2781        | .7813          |
| BMI                               | 0.5734          | 0.2322            | 2.4692         | .0148          |
| IOP                               | -0.4265         | 0.3546            | -1.2027        | .2312          |
| Spherical Equivalent              | 1.0921          | 0.6713            | 1.6270         | .1061          |
| OCT Signal Strength (9)           | 1.6070          | 4.9052            | 0.3276         | .7437          |
| OCT Signal Strength (8)           | 2.7285          | 4.6574            | 0.5858         | .5590          |
| OCT Signal Strength (7)           | 0.4210          | 4.6763            | 0.0900         | .9284          |
| OCT Signal Strength (6)           | 0.3800          | 5.2525            | 0.0723         | .9424          |
| <b>B. Smooth terms</b>            | <b>edf</b>      | <b>Ref.df</b>     | <b>F value</b> | <b>p value</b> |
| Age                               | 1.4669          | 1.5169            | 7.5300         | .0016          |
| ID                                | 106.4008        | 128.0000          | 5.5478         | < .0001        |

**Dependent: pRNFL Thickness [ $\mu\text{m}$ ], Superior Quadrant**

| <b>A. Parametric coefficients</b> | <b>Estimate</b> | <b>Std. Error</b> | <b>t value</b> | <b>p value</b> |
|-----------------------------------|-----------------|-------------------|----------------|----------------|
| Intercept                         | 73.9080         | 4.7490            | 15.5629        | < .0001        |
| Group                             | -3.6164         | 2.5557            | -1.4150        | .1595          |
| Sex (female)                      | -0.0272         | 2.0339            | -0.0134        | .9894          |
| Hypertension                      | 4.3126          | 3.2875            | 1.3118         | .1919          |
| Diabetes                          | 3.5385          | 5.7281            | 0.6177         | .5379          |
| Smoking                           | 0.3619          | 2.2112            | 0.1637         | .8702          |
| Age                               | -0.0615         | 0.0885            | -0.6954        | .4881          |
| Spherical Equivalent              | 0.6798          | 0.5359            | 1.2684         | .2070          |
| OCT Signal Strength (9)           | 0.9975          | 3.5743            | 0.2791         | .7806          |
| OCT Signal Strength (8)           | 1.1439          | 3.3873            | 0.3377         | .7361          |
| OCT Signal Strength (7)           | -3.3302         | 3.4072            | -0.9774        | .3302          |
| OCT Signal Strength (6)           | -6.6669         | 3.8279            | -1.7417        | .0840          |
| <b>B. Smooth terms</b>            | <b>edf</b>      | <b>Ref.df</b>     | <b>F value</b> | <b>p value</b> |
| BMI                               | 2.3809          | 2.4519            | 1.3388         | .1716          |
| IOP                               | 4.7879          | 5.4914            | 2.2666         | .0465          |
| ID                                | 109.6315        | 128.0000          | 6.4177         | < .0001        |

**Dependent: pRNFL Thickness [ $\mu\text{m}$ ], Nasal Quadrant**

| <b>A. Parametric coefficients</b> | <b>Estimate</b> | <b>Std. Error</b> | <b>t value</b> | <b>p value</b> |
|-----------------------------------|-----------------|-------------------|----------------|----------------|
| Intercept                         | 66.2877         | 4.7178            | 14.0504        | < .0001        |
| Group                             | -2.6159         | 2.2445            | -1.1655        | .2460          |
| Sex (female)                      | 1.3230          | 1.7567            | 0.7531         | .4527          |
| Hypertension                      | 4.3288          | 2.9249            | 1.4800         | .1413          |
| Diabetes                          | -4.7652         | 5.0781            | -0.9384        | .3498          |
| Smoking                           | -2.0171         | 1.9808            | -1.0183        | .3104          |
| IOP                               | -0.0819         | 0.2458            | -0.3330        | .7396          |
| Spherical Equivalent              | -0.9353         | 0.4773            | -1.9596        | .0522          |
| OCT Signal Strength (9)           | 2.3606          | 3.1696            | 0.7448         | .4578          |
| OCT Signal Strength (8)           | 0.4201          | 3.0010            | 0.1400         | .8889          |
| OCT Signal Strength (7)           | -1.2443         | 3.0121            | -0.4131        | .6802          |
| OCT Signal Strength (6)           | 0.1408          | 3.3939            | 0.0415         | .9670          |
| <b>B. Smooth terms</b>            | <b>edf</b>      | <b>Ref.df</b>     | <b>F value</b> | <b>p value</b> |
| Age                               | 2.0561          | 2.1128            | 1.8793         | .1427          |
| BMI                               | 1.2570          | 1.2825            | 0.2862         | .5217          |
| ID                                | 110.4824        | 128.0000          | 8.1696         | < .0001        |

**Dependent: pRNFL Thickness [ $\mu\text{m}$ ], Temporal Quadrant**

| <b>A. Parametric coefficients</b> | <b>Estimate</b> | <b>Std. Error</b> | <b>t value</b> | <b>p value</b> |
|-----------------------------------|-----------------|-------------------|----------------|----------------|
| Intercept                         | 0.1837          | 0.0566            | 3.2483         | .0016          |
| Group                             | 0.0289          | 0.0263            | 1.0994         | .2743          |
| Sex (female)                      | 0.0326          | 0.0206            | 1.5843         | .1164          |
| Hypertension                      | -0.0273         | 0.0326            | -0.8369        | .4047          |
| Diabetes                          | -0.0320         | 0.0566            | -0.5649        | .5735          |
| Smoking                           | 0.0074          | 0.0235            | 0.3169         | .7520          |
| BMI                               | -0.0018         | 0.0020            | -0.8810        | .3805          |
| IOP                               | 0.0034          | 0.0021            | 1.6138         | .1098          |
| OCT Signal Strength (9)           | 0.0047          | 0.0066            | 0.7120         | .4782          |
| OCT Signal Strength (8)           | 0.0002          | 0.0077            | 0.0252         | .9800          |
| <b>B. Smooth terms</b>            | <b>edf</b>      | <b>Ref.df</b>     | <b>F value</b> | <b>p value</b> |
| Age                               | 6.3031          | 6.3383            | 1.1583         | .3261          |
| Spherical Equivalent              | 6.4516          | 7.1196            | 1.1888         | .2727          |
| ID                                | 100.2436        | 111.0000          | 17.3688        | < .0001        |

**Dependent: FAZ size [ $\text{mm}^2$ ]**

| <b>A. Parametric coefficients</b> | <b>Estimate</b> | <b>Std. Error</b> | <b>t value</b> | <b>p value</b> |
|-----------------------------------|-----------------|-------------------|----------------|----------------|
| Intercept                         | 0.2177          | 0.0293            | 7.4221         | < .0001        |
| Group                             | 0.0014          | 0.0139            | 0.0993         | .9211          |
| Sex (female)                      | -0.0394         | 0.0107            | -3.6876        | .0003          |
| Hypertension                      | 0.0214          | 0.0167            | 1.2849         | .2011          |
| Diabetes                          | 0.0308          | 0.0287            | 1.0742         | .2846          |
| Smoking                           | -0.0064         | 0.0114            | -0.5591        | .5770          |
| Age                               | 0.0006          | 0.0005            | 1.3237         | .1879          |
| IOP                               | 0.0020          | 0.0017            | 1.1806         | .2399          |
| OCT Signal Strength (9)           | -0.0332         | 0.0083            | -4.0221        | .0001          |
| OCT Signal Strength (8)           | -0.0940         | 0.0094            | -10.0272       | < .0001        |
| <b>B. Smooth terms</b>            | <b>edf</b>      | <b>Ref.df</b>     | <b>F value</b> | <b>p value</b> |
| BMI                               | 3.7605          | 3.9446            | 4.6534         | .0014          |
| Spherical Equivalent              | 3.4900          | 3.9468            | 0.7083         | .5090          |
| ID                                | 79.3434         | 117.0000          | 2.5772         | < .0001        |

**Dependent: Perfusion Density [ $\text{mm}^2/\text{mm}^2$ ], Macula, Central Subfield**

| <b>A. Parametric coefficients</b> | <b>Estimate</b> | <b>Std. Error</b> | <b>t value</b> | <b>p value</b> |
|-----------------------------------|-----------------|-------------------|----------------|----------------|
| Intercept                         | 0.4485          | 0.0071            | 63.2070        | < .0001        |
| Group                             | -0.0047         | 0.0079            | -0.6010        | .5487          |
| Sex (female)                      | -0.0114         | 0.0061            | -1.8580        | .0649          |
| Hypertension                      | 0.0053          | 0.0095            | 0.5550         | .5796          |
| Diabetes                          | 0.0069          | 0.0165            | 0.4186         | .6760          |
| Smoking                           | -0.0065         | 0.0066            | -0.9893        | .3239          |
| OCT Signal Strength (9)           | -0.0195         | 0.0060            | -3.2239        | .0015          |
| OCT Signal Strength (8)           | -0.0677         | 0.0067            | -10.0685       | < .0001        |
| <b>B. Smooth terms</b>            | <b>edf</b>      | <b>Ref.df</b>     | <b>F value</b> | <b>p value</b> |
| Age                               | 2.0139          | 2.2909            | 1.9305         | .1235          |
| BMI                               | 3.6046          | 3.9874            | 1.1036         | .3426          |
| IOP                               | 2.4464          | 2.8725            | 0.9923         | .3239          |
| Spherical Equivalent              | 3.7308          | 4.2684            | 1.8390         | .1053          |
| ID                                | 44.7404         | 117.0000          | 0.6458         | .0007          |

**Dependent: Perfusion Density [mm<sup>2</sup>/mm<sup>2</sup>], Macula, Parafoveal Ring**

| <b>A. Parametric coefficients</b> | <b>Estimate</b> | <b>Std. Error</b> | <b>t value</b> | <b>p value</b> |
|-----------------------------------|-----------------|-------------------|----------------|----------------|
| Intercept                         | 9.5611          | 1.2614            | 7.5796         | < .0001        |
| Group                             | 0.0671          | 0.5950            | 0.1127         | .9104          |
| Sex (female)                      | -1.7207         | 0.4596            | -3.7436        | .0003          |
| Hypertension                      | 0.9162          | 0.7177            | 1.2764         | .2040          |
| Diabetes                          | 1.2819          | 1.2339            | 1.0389         | .3007          |
| Smoking                           | -0.3491         | 0.4916            | -0.7102        | .4788          |
| Age                               | 0.0259          | 0.0210            | 1.2357         | .2187          |
| IOP                               | 0.0942          | 0.0714            | 1.3194         | .1893          |
| OCT Signal Strength (9)           | -1.3854         | 0.3563            | -3.8882        | .0002          |
| OCT Signal Strength (8)           | -3.9175         | 0.4043            | -9.6896        | < .0001        |
| <b>B. Smooth terms</b>            | <b>edf</b>      | <b>Ref.df</b>     | <b>F value</b> | <b>p value</b> |
| BMI                               | 4.3229          | 4.5085            | 4.9530         | .0010          |
| Spherical Equivalent              | 3.5355          | 3.9976            | 0.8339         | .4885          |
| ID                                | 78.4464         | 117.0000          | 2.5303         | < .0001        |

**Dependent: Vessel Density [mm/mm<sup>2</sup>], Macula, Central Subfield**

| <b>A. Parametric coefficients</b> | <b>Estimate</b> | <b>Std. Error</b> | <b>t value</b> | <b>p value</b> |
|-----------------------------------|-----------------|-------------------|----------------|----------------|
| Intercept                         | 18.4958         | 0.2794            | 66.1942        | < .0001        |
| Group                             | -0.2402         | 0.3079            | -0.7801        | .4364          |
| Sex (female)                      | -0.3809         | 0.2388            | -1.5954        | .1124          |
| Hypertension                      | 0.3023          | 0.3715            | 0.8137         | .4169          |
| Diabetes                          | 0.3495          | 0.6455            | 0.5414         | .5889          |
| Smoking                           | -0.2682         | 0.2573            | -1.0425        | .2987          |
| OCT Signal Strength (9)           | -0.7870         | 0.2431            | -3.2368        | .0014          |
| OCT Signal Strength (8)           | -2.6877         | 0.2696            | -9.9706        | < .0001        |
| <b>B. Smooth terms</b>            | <b>edf</b>      | <b>Ref.df</b>     | <b>F value</b> | <b>p value</b> |
| Age                               | 2.0574          | 2.3694            | 2.1428         | .0915          |
| BMI                               | 3.6913          | 4.1180            | 1.1750         | .3535          |
| IOP                               | 2.3757          | 2.8044            | 0.8422         | .3755          |
| Spherical Equivalent              | 3.8080          | 4.3781            | 1.5343         | .1571          |
| ID                                | 37.7865         | 117.0000          | 0.4916         | .0047          |

**Dependent: Vessel Density [mm/mm<sup>2</sup>], Macula, Parafoveal Ring**



| <b>A. Parametric coefficients</b> | <b>Estimate</b> | <b>Std. Error</b> | <b>t value</b> | <b>p value</b> |
|-----------------------------------|-----------------|-------------------|----------------|----------------|
| Intercept                         | 0.4518          | 0.0060            | 75.1220        | < .0001        |
| Group                             | 0.0023          | 0.0029            | 0.8074         | .4210          |
| Sex (female)                      | 0.0066          | 0.0023            | 2.8695         | .0048          |
| Hypertension                      | 0.0004          | 0.0037            | 0.1110         | .9118          |
| Diabetes                          | 0.0090          | 0.0069            | 1.2933         | .1983          |
| Smoking                           | -0.0002         | 0.0001            | -2.1553        | .0331          |
| Age                               | 0.0001          | 0.0003            | 0.3864         | .6998          |
| IOP                               | 0.0006          | 0.0006            | 0.8836         | .3786          |
| Spherical Equivalent              | -0.0015         | 0.0025            | -0.6076        | .5446          |
| OCT Signal Strength (9)           | -0.0030         | 0.0015            | -1.9982        | .0479          |
| OCT Signal Strength (8)           | -0.0046         | 0.0015            | -3.0018        | .0032          |
| <b>B. Smooth terms</b>            | <b>edf</b>      | <b>Ref.df</b>     | <b>F value</b> | <b>p value</b> |
| BMI                               | 3.9110          | 4.0333            | 1.3377         | .2697          |
| ID                                | 91.4338         | 117.0000          | 4.5949         | < .0001        |

**Dependent: Perfusion Density [mm<sup>2</sup>/mm<sup>2</sup>], Peripapillary**

### Non-linear Effects (oculus uterque)

*Abbreviations:* BMI, body mass index; FAZ, foveal avascular zone; ID, random intercept for the participant identification; IOP, intraocular pressure; mGCIPL, macular ganglion cell–inner plexiform layer; mRNFL, macular retinal nerve fiber layer; pRNFL, peripapillary retinal nerve fiber layer; SphE, Spherical Equivalent.

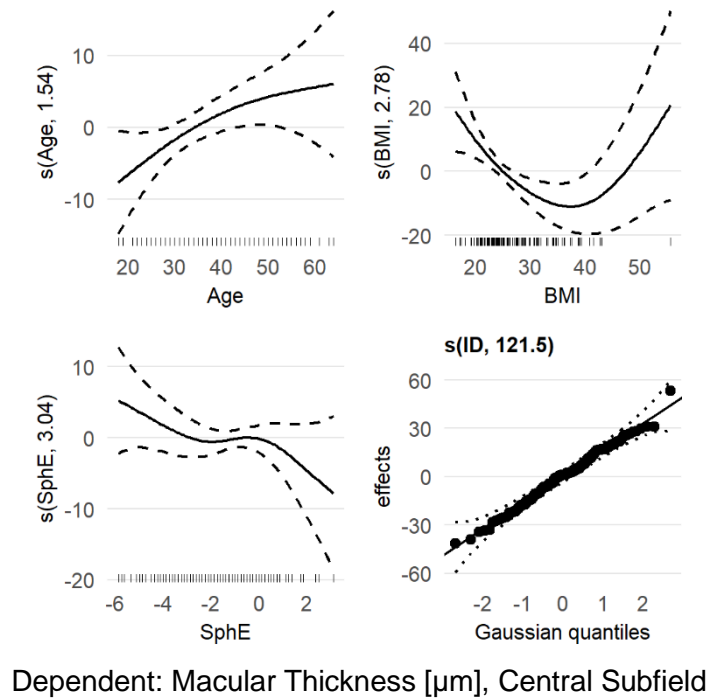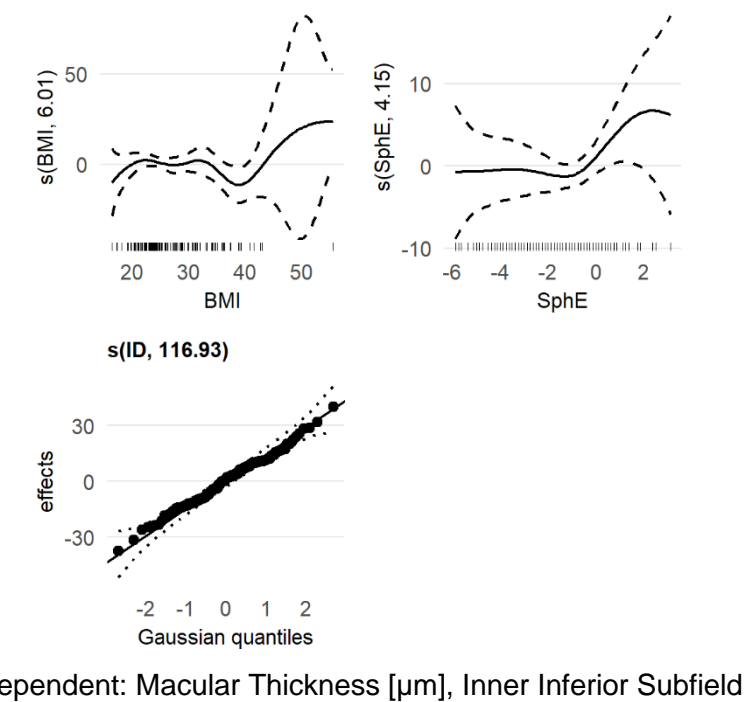

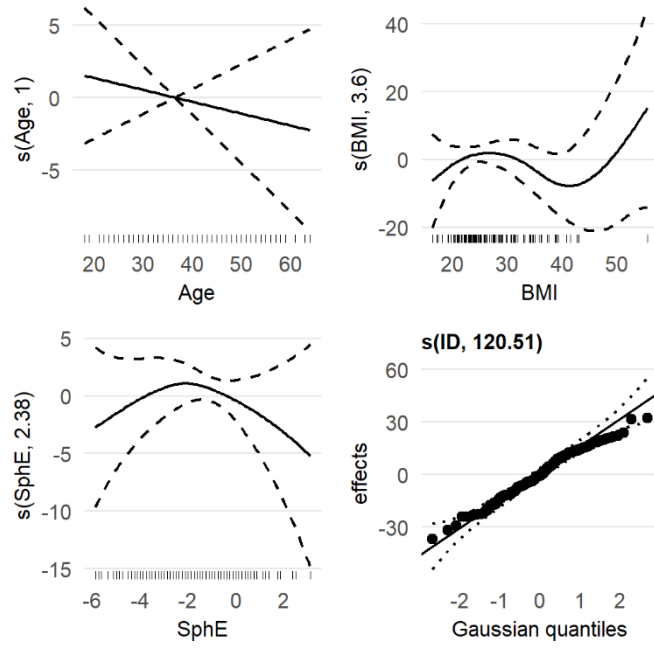

Dependent: Macular Thickness [ $\mu\text{m}$ ], Inner Superior Subfield

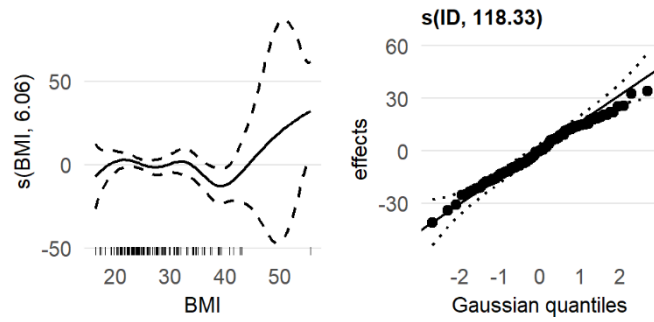

Dependent: Macular Thickness [ $\mu\text{m}$ ], Inner Nasal Subfield

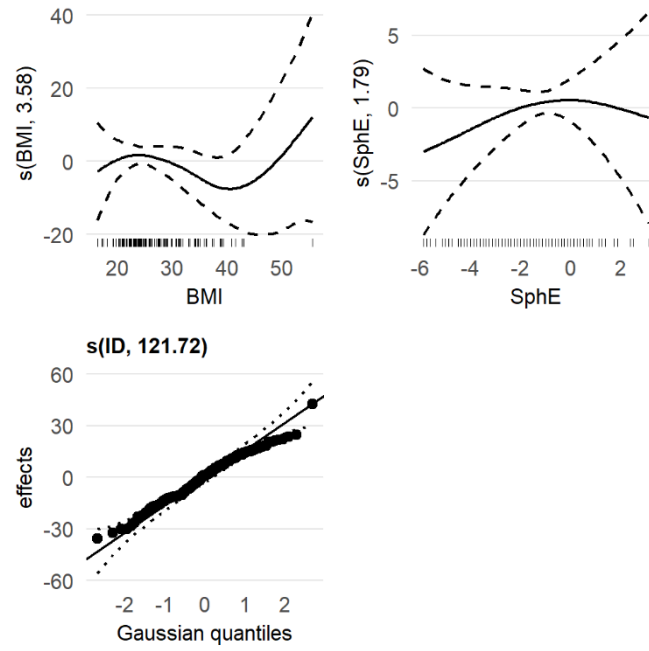

Dependent: Macular Thickness [ $\mu\text{m}$ ], Inner Temporal Subfield

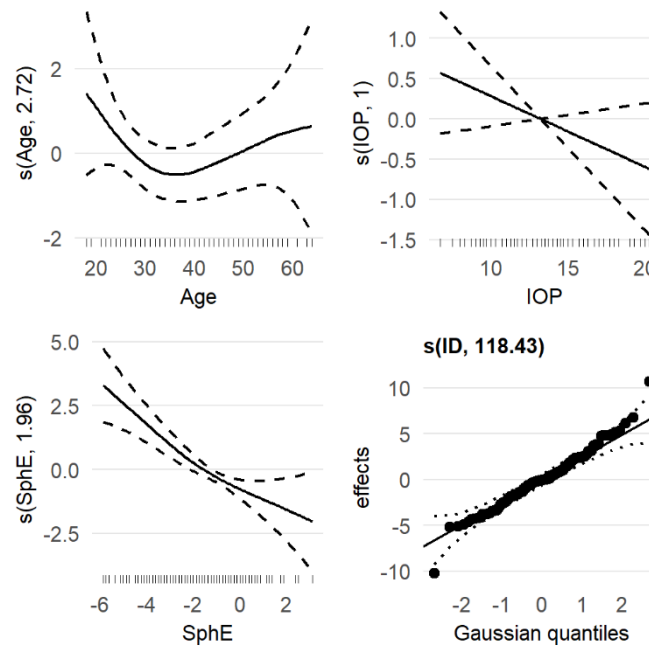

Dependent: mRNFL Thickness [ $\mu\text{m}$ ]

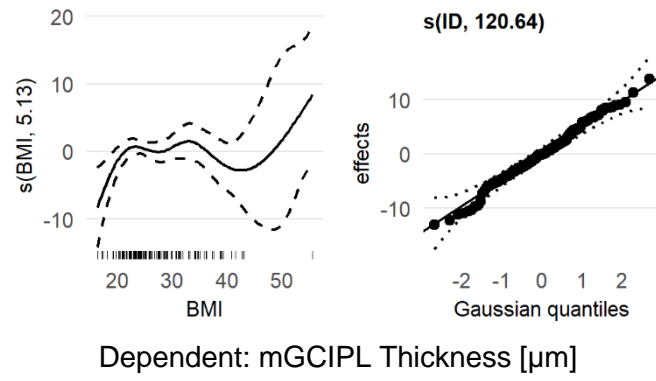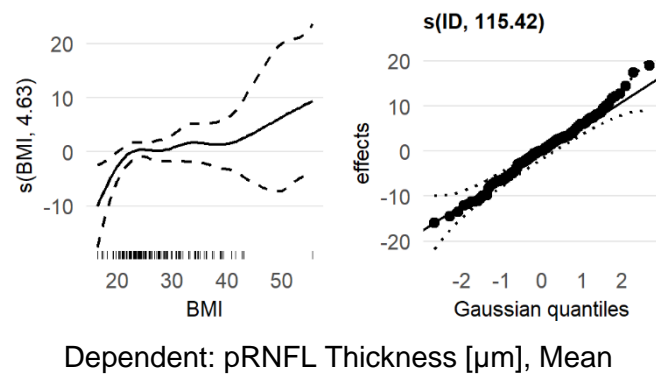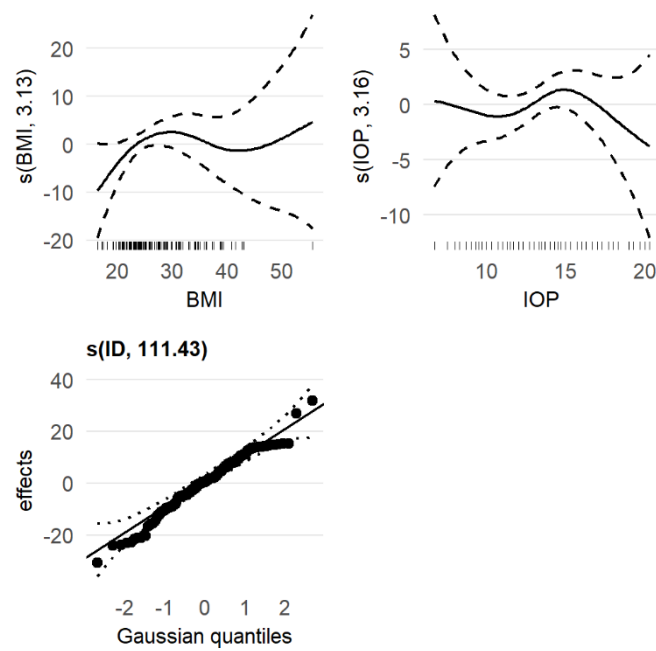

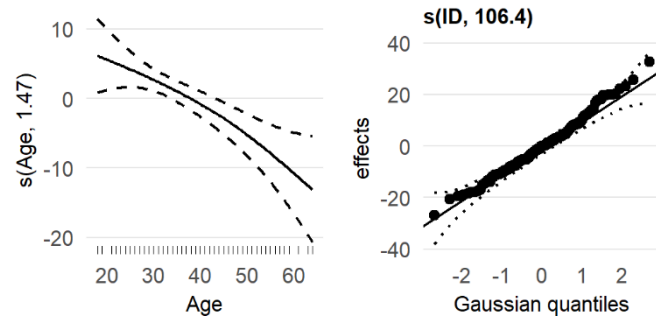

Dependent: pRNFL Thickness [ $\mu\text{m}$ ], Superior Quadrant

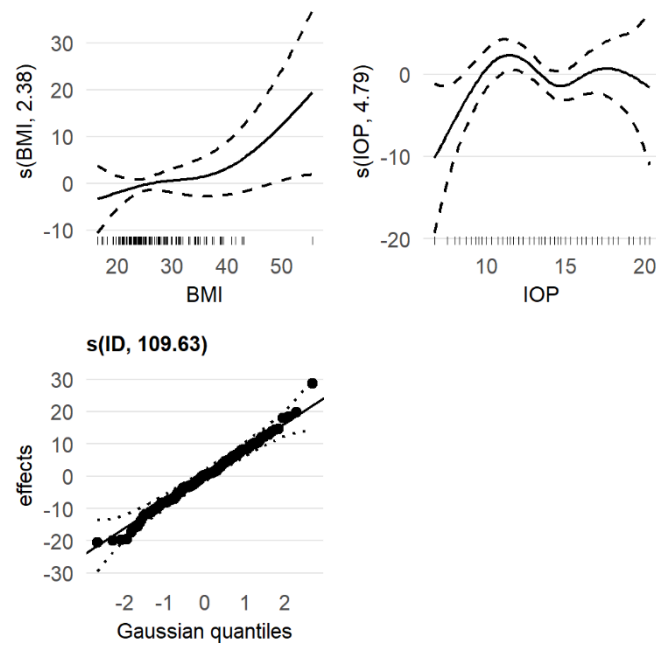

Dependent: pRNFL Thickness [ $\mu\text{m}$ ], Nasal Quadrant

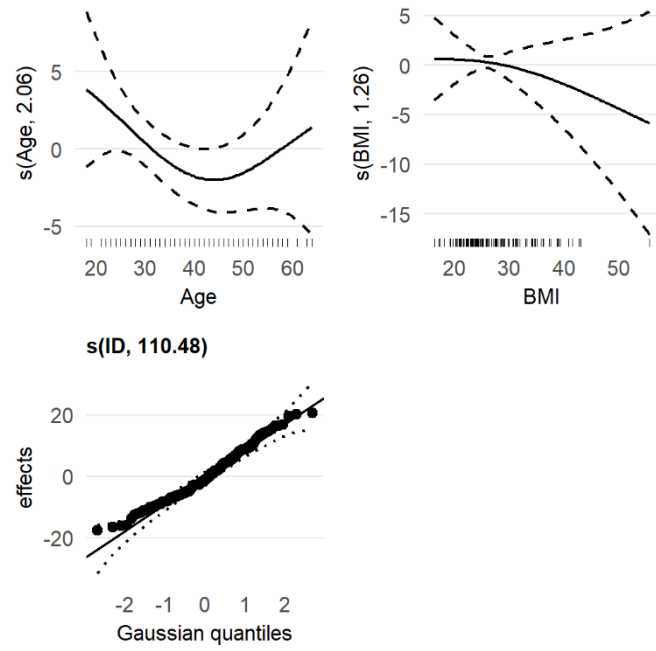

Dependent: pRNFL Thickness [μm], Temporal Quadrant

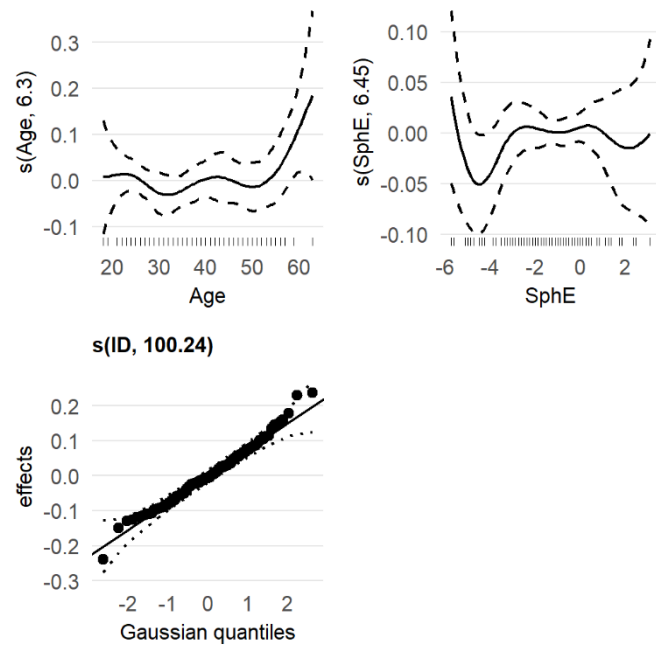

Dependent: FAZ size [mm<sup>2</sup>]

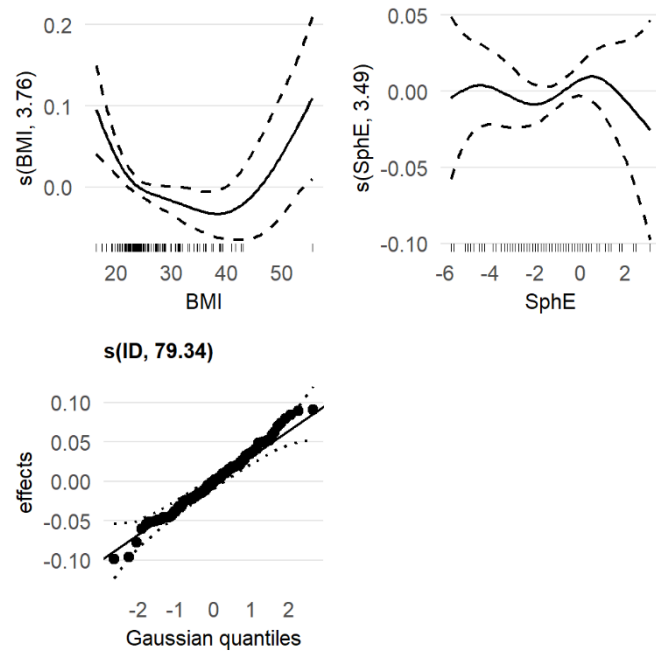

Dependent: Perfusion Density [ $\text{mm}^2/\text{mm}^2$ ], Macula, Central Subfield

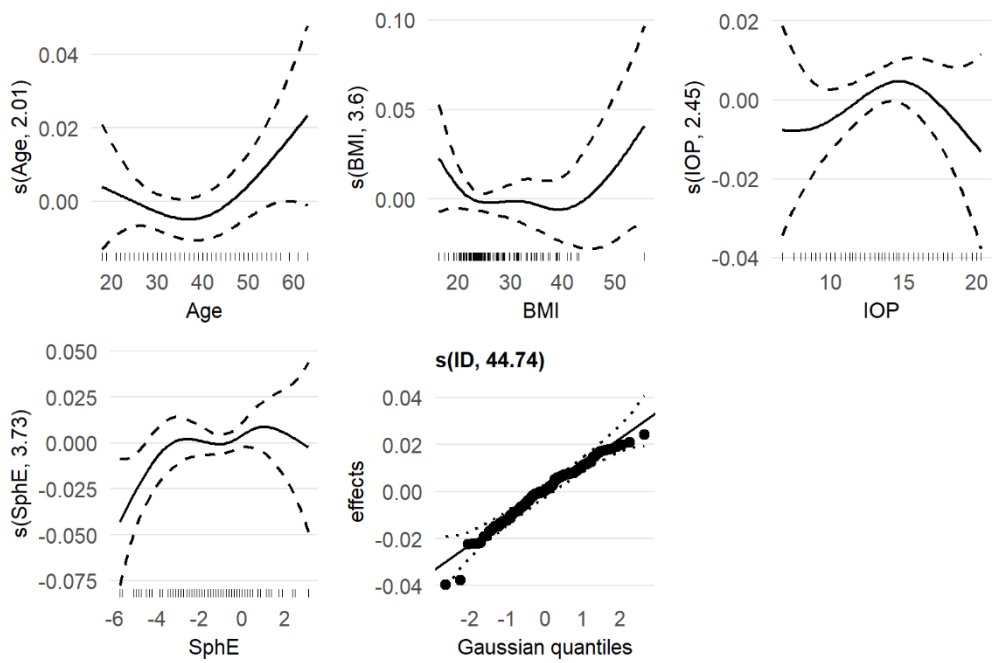

Dependent: Perfusion Density [ $\text{mm}^2/\text{mm}^2$ ], Macula, Parafoveal Ring



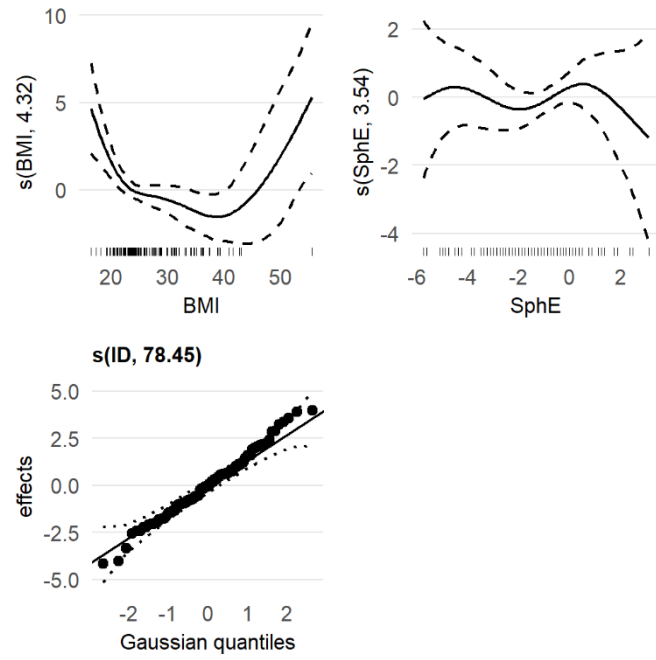

Dependent: Vessel Density [mm/mm<sup>2</sup>], Macula, Central Subfield

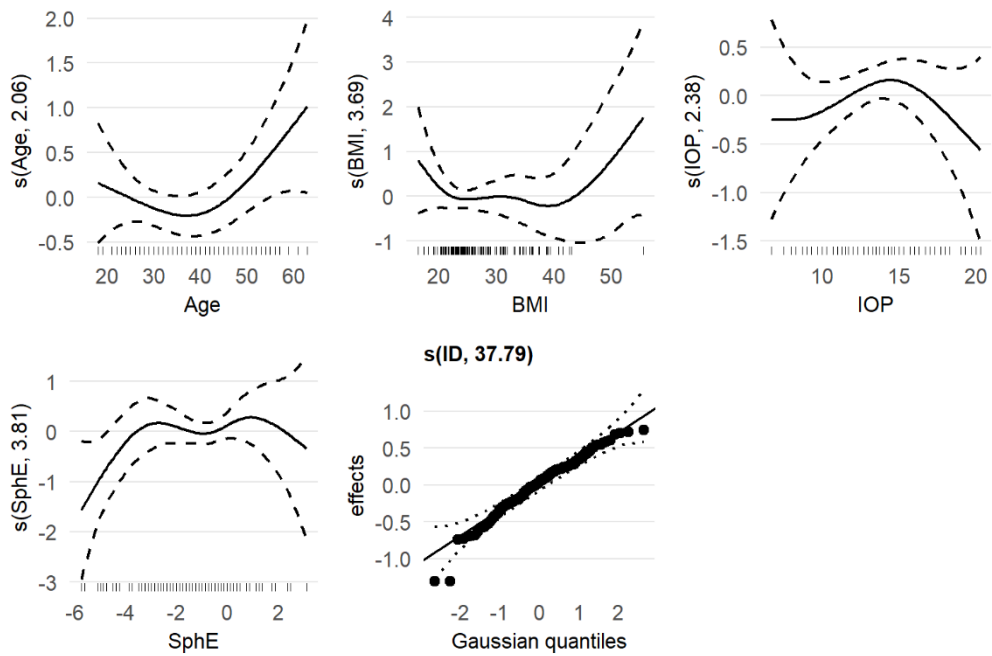

Dependent: Vessel Density [mm/mm<sup>2</sup>], Macula, Parafoveal Ring

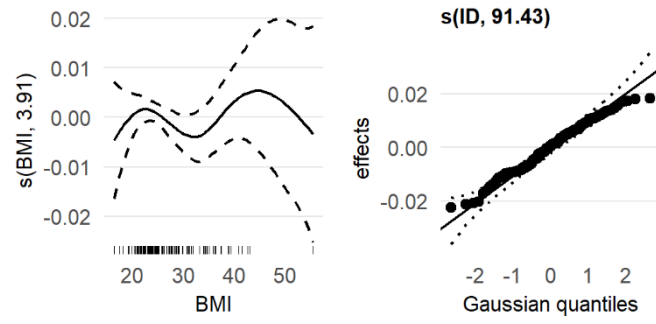

Dependent: Perfusion Density [ $\text{mm}^2/\text{mm}^2$ ], Peripapillary
